# Supplementary material for: Multivariate statistical models of metabolomic data reveals different metabolite distribution patterns in isonitrosoacetophenone-elicited Nicotiana tabacum and Sorghum bicolor cells
Source: PubMed Central journal article supplement (PMC4044000; doi:10.1186/2193-1801-3-254), 2014-05-20
Supplement: 40064_2014_978_MOESM1_ESM.pdf [file 40064_2014_978_MOESM1_ESM.pdf]

# Multivariate statistical models of metabolomic data reveals different metabolite distribution patterns in isonitrosoacetophenone-elicited *Nicotiana tabacum* and *Sorghum bicolor* cells.

Ntakadzeni E Madala<sup>1</sup>, Lizelle A Piater<sup>1</sup>, Paul A Steenkamp<sup>1,2</sup> and Ian A Dubery<sup>1\*</sup>.

<sup>1</sup>Department of Biochemistry, University of Johannesburg, Auckland Park, 2006, South Africa

<sup>2</sup>BioSciences, CSIR, Pretoria, 0001, South Africa.

---

## **Additional file 1:**

**Figure S1 A-E: OPLS-DA based SUS-plots showing metabolite distribution from different time intervals of INAP elicited tobacco cell suspensions.** For the code description M2 encodes 6 h, M3 12 h, M4 18 h, and M5 24 h.

**Figure S2 A-E: OPLS-DA based SUS-plots showing metabolite distribution from different time intervals of INAP elicited sorghum cell suspensions.** For the code description M2 encodes 6 h, M3 12 h, M4 18 h, and M5 24 h.

**Tables S1–S2. Cross-validation (CV)-Anova of OPLS-DA-derived SUS plots for tobacco and sorghum.** M2, M3, M4 and M5 refers to Control vs. 6 h, Control vs. 12 h, Control vs. 18 h and Control vs. 24 h respectively.

**Figure S1:** OPLS-DA based SUS-plots showing metabolite distribution from different treatment time intervals, **A** (6 h vs 12 h), **B** (6 h vs 24 h), **C** (12 h vs 18 h), **D** (12 h vs 24 h) and **E** (18 h vs 24) of **tobacco cell suspensions** treated with 1 mM isonitrosacetophenone. For keys features, refer to [Fig. 4](#).

S1-A.

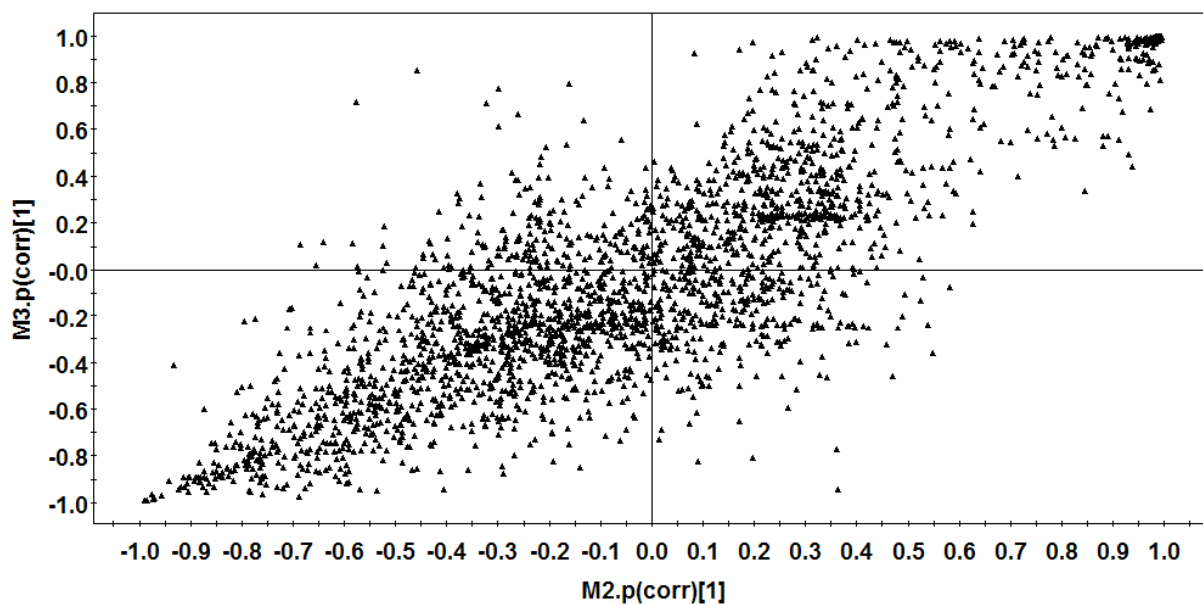

S1-B.

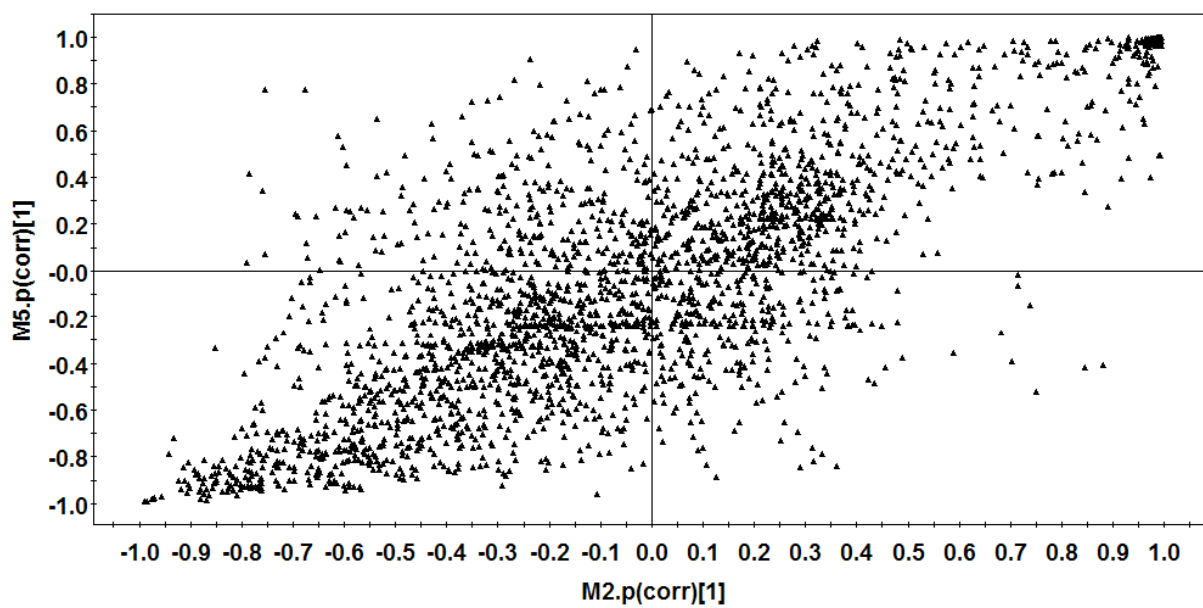

S1-C.

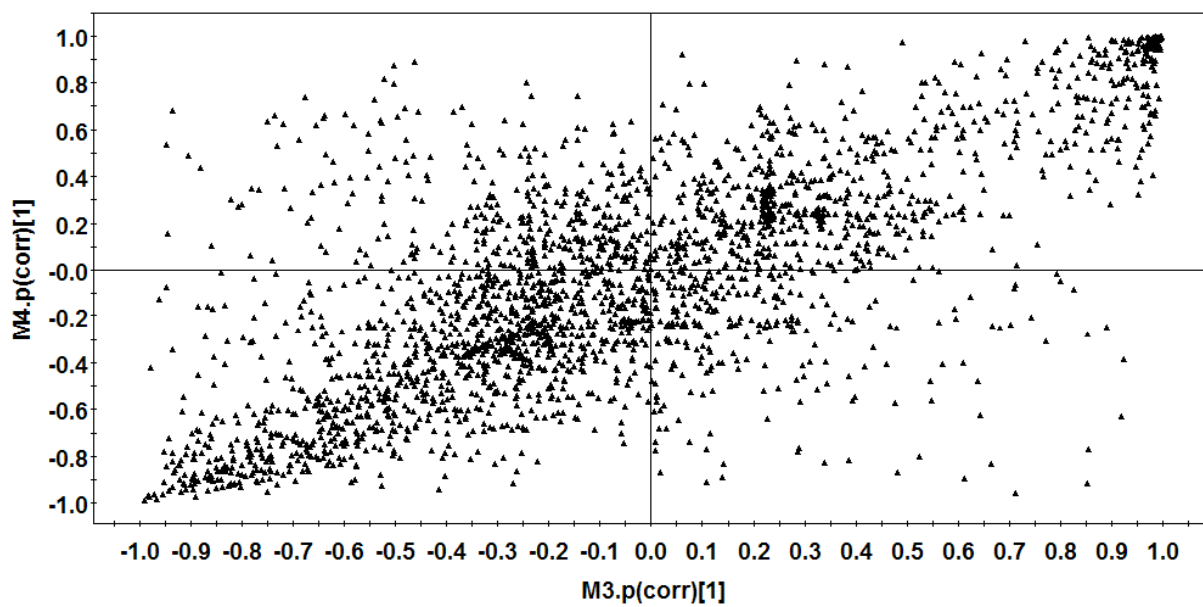

S1-D.

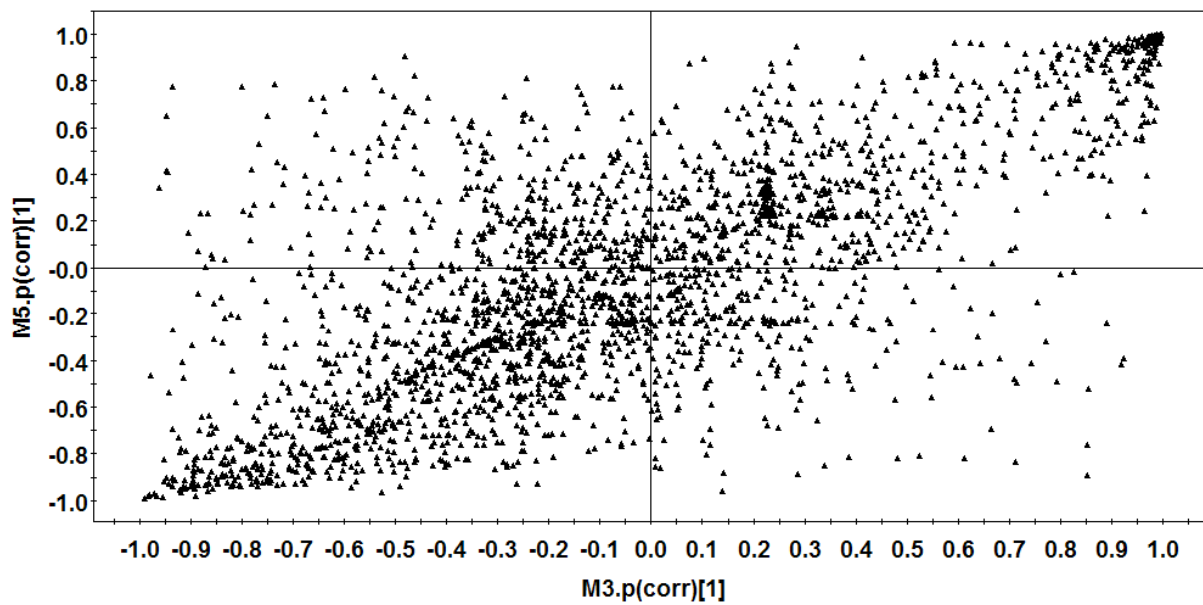

S1-E.

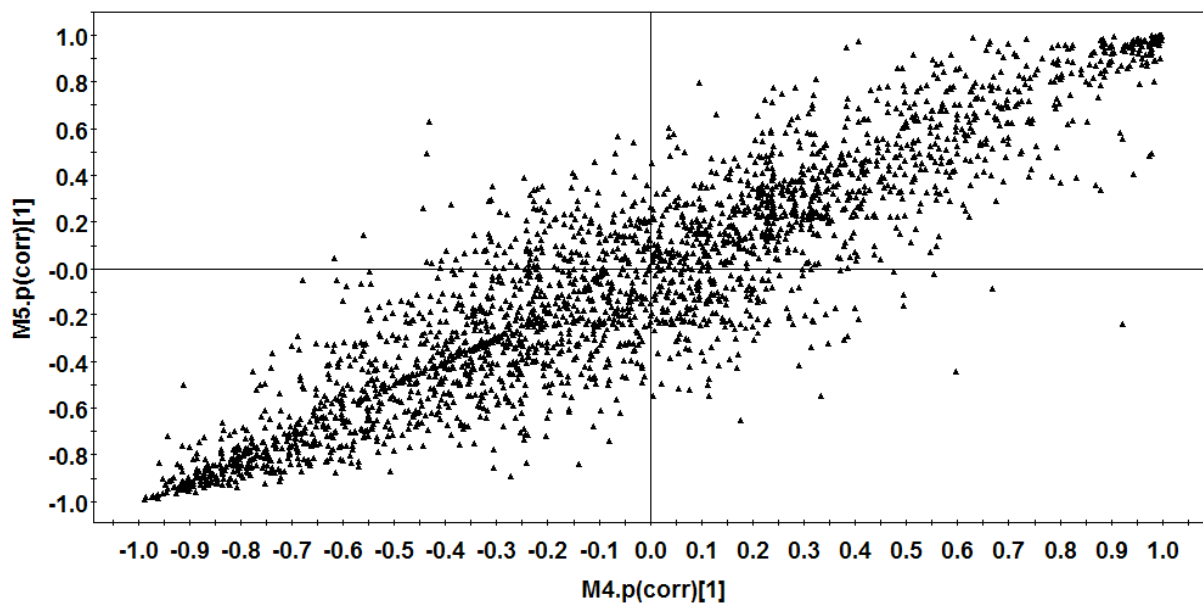

**Figure S2:** OPLS-DA based SUS-plots showing metabolite distribution from different treatment time intervals, **A** (6 h vs. 12 h), **B** (6 h vs. 24 h), **C** (12 h vs. 18 h), **D** (12 h vs. 24 h) and **E** (18 h vs. 24) of **sorghum cell suspensions** treated with 1 mM isonitrosacetophenone. For keys features, refer to [Fig. 4](#).

S2-A.

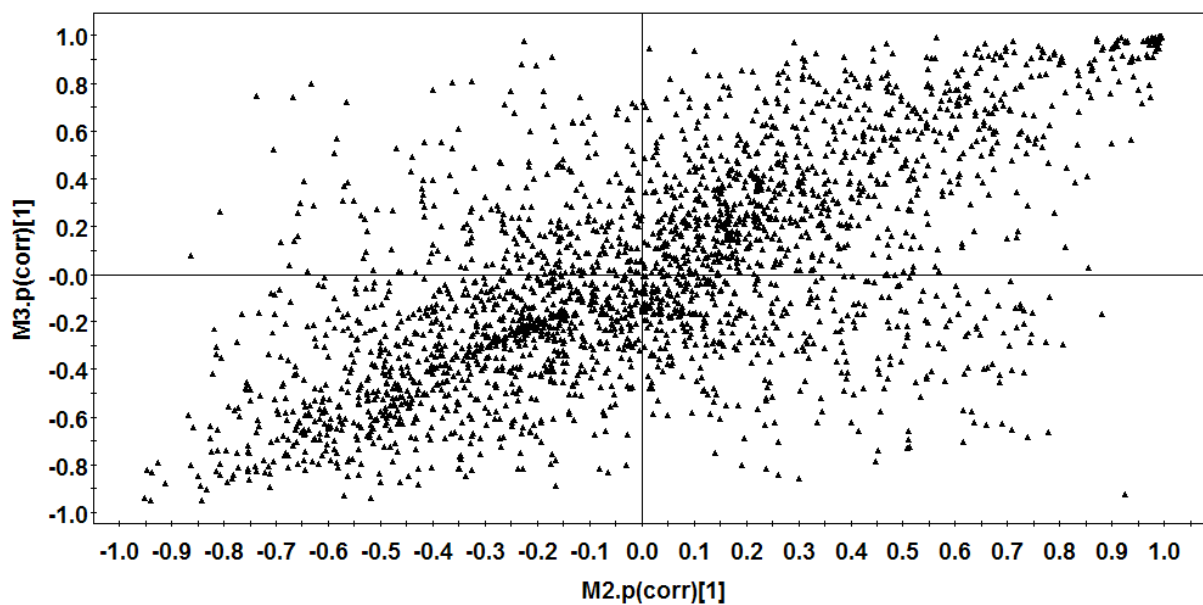

S2-B.

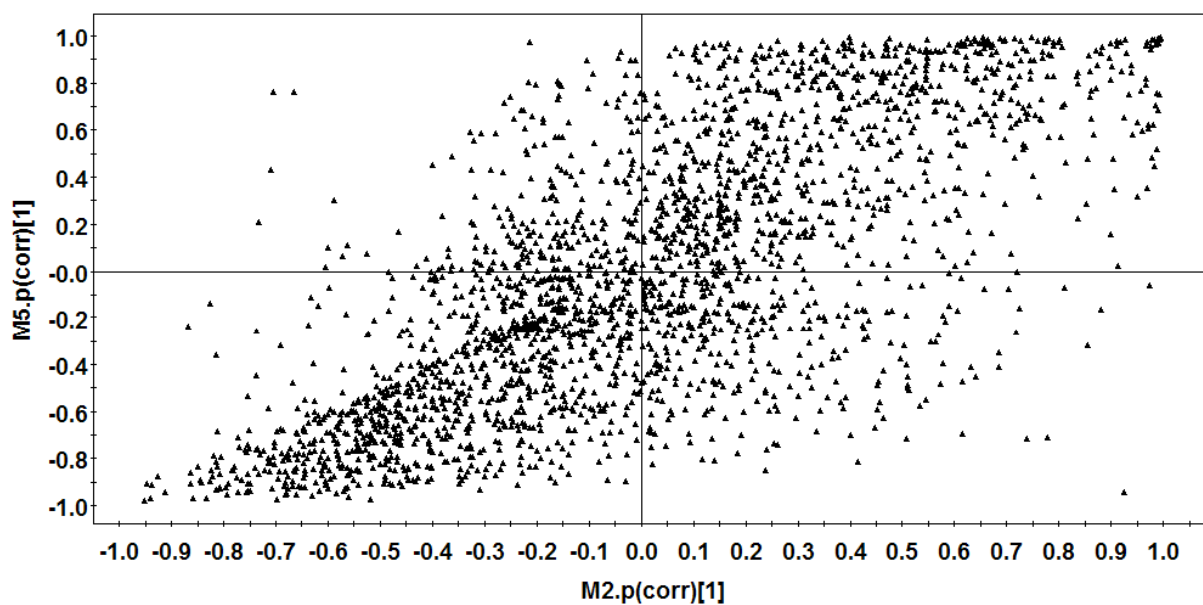

S2-C.

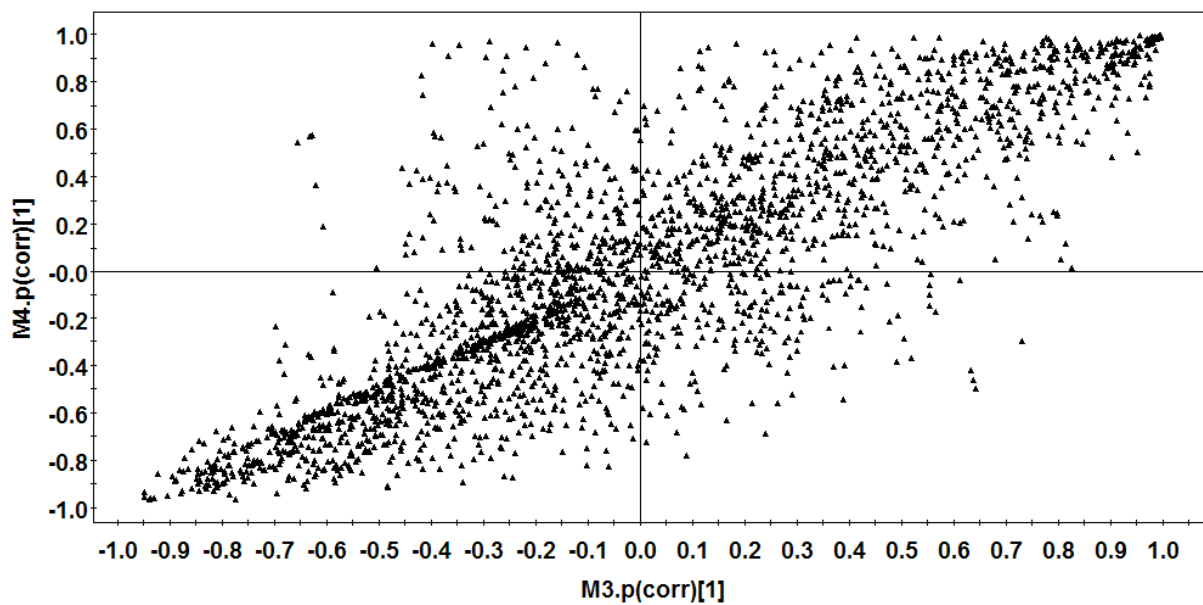

S2-D.

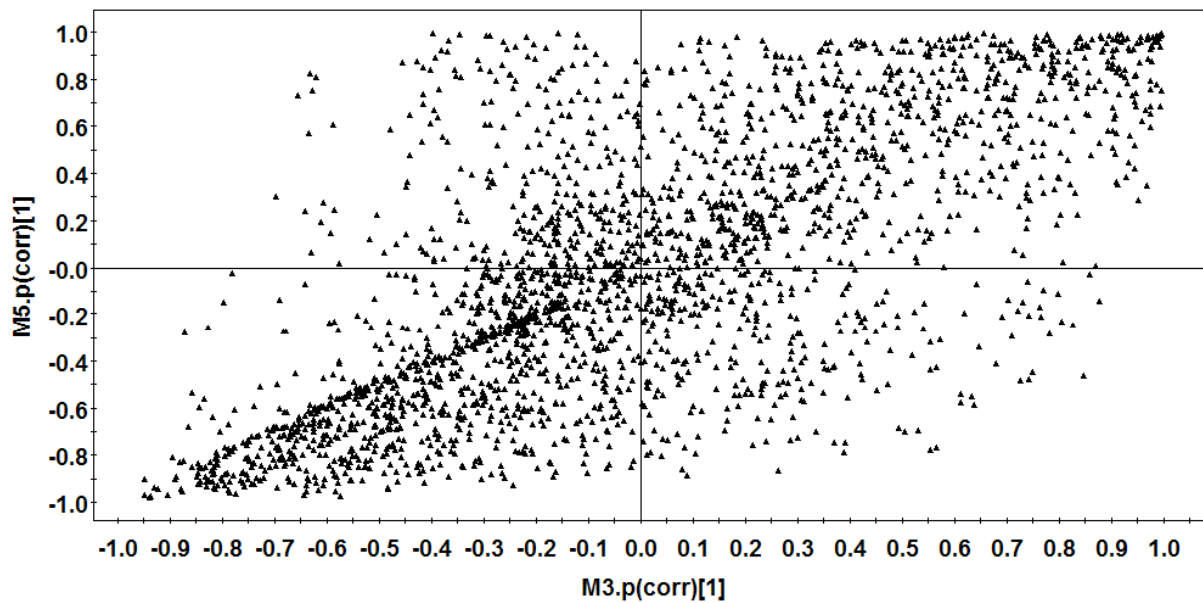

S2-E.

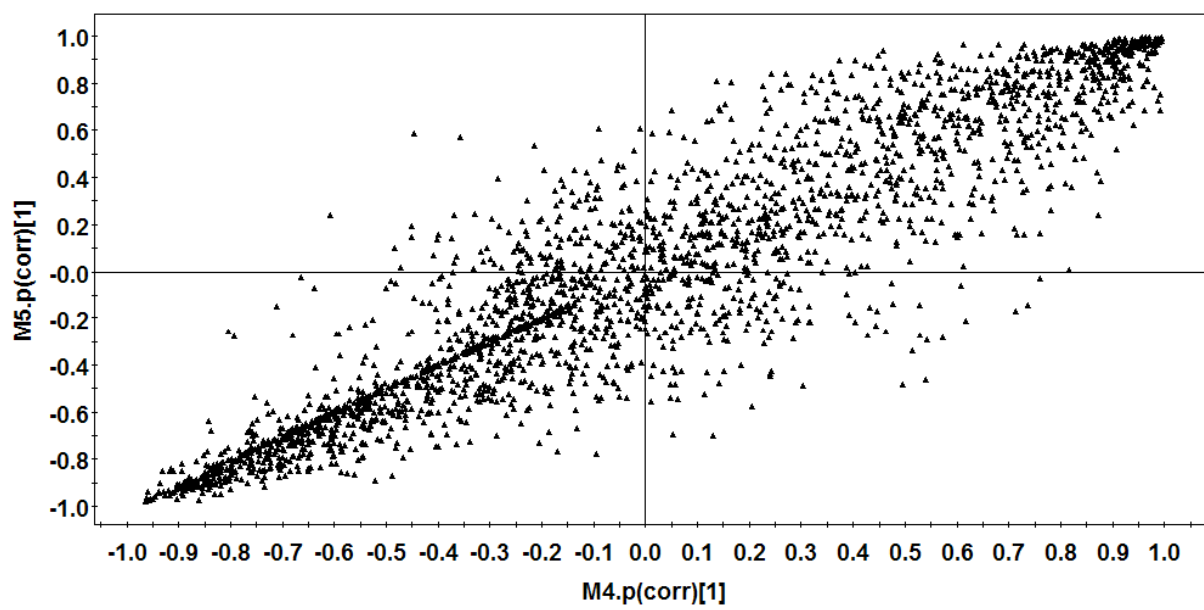

**Tables S1 –S2. CV-Anova validation of OPLS-DA derived SUS plots.** M2, M3, M4 and M5 refers to Control vs. 6 h, Control vs. 12 h, Control vs. 18 h and Control vs. 24 h respectively.

### 1. INAP treated tobacco cells

a. CV-anova results for the OPLS model for M2

$$[R^2X (\text{cum}) = 0.390; R^2Y (\text{cum}) = 0.995; Q^2 (\text{cum}) = 0.966].$$

| M2(Untitled)       | SS       | DF | MS        | F       | P            | SD       |
|--------------------|----------|----|-----------|---------|--------------|----------|
| <b>Total corr.</b> | 19       | 19 | 1         |         |              | 1        |
| <b>Regression</b>  | 18.3612  | 4  | 4.59031   | 107.795 | 7.34028e-011 | 2.1425   |
| <b>Residual</b>    | 0.638758 | 15 | 0.0425839 |         |              | 0.206359 |

b. CV-anova results for the OPLS model for M3

$$[R^2X (\text{cum}) = 0.493; R^2Y (\text{cum}) = 0.998; Q^2 (\text{cum}) = 0.985].$$

| M3(Untitled)       | SS       | DF | MS        | F       | P           | SD       |
|--------------------|----------|----|-----------|---------|-------------|----------|
| <b>Total corr.</b> | 18       | 18 | 1         |         |             | 1        |
| <b>Regression</b>  | 17.7266  | 4  | 4.43165   | 226.929 | 1.4723e-012 | 2.10515  |
| <b>Residual</b>    | 0.273403 | 14 | 0.0195288 |         |             | 0.139745 |

c. CV-anova results for the OPLS model for M4

$$[R^2X (\text{cum}) = 0.444; R^2Y (\text{cum}) = 0.998; Q^2 (\text{cum}) = 0.986].$$

| M4(Untitled)       | SS       | DF | MS        | F       | P           | SD       |
|--------------------|----------|----|-----------|---------|-------------|----------|
| <b>Total corr.</b> | 19       | 19 | 1         |         |             | 1        |
| <b>Regression</b>  | 18.7399  | 4  | 4.68496   | 270.135 | 8.8637e-014 | 2.16448  |
| <b>Residual</b>    | 0.260146 | 15 | 0.0173431 |         |             | 0.131693 |

d. CV-anova results for the OPLS model for M5

$$[R^2X (\text{cum}) = 0.486; R^2Y (\text{cum}) = 0.999; Q^2 (\text{cum}) = 0.985].$$

| M5(Untitled)       | SS       | DF | MS        | F       | P            | SD      |
|--------------------|----------|----|-----------|---------|--------------|---------|
| <b>Total corr.</b> | 19       | 19 | 1         |         |              | 1       |
| <b>Regression</b>  | 18.7138  | 4  | 4.67846   | 245.239 | 1.80922e-013 | 2.16297 |
| <b>Residual</b>    | 0.286157 | 15 | 0.0190772 |         |              | 0.13812 |



## 2. INAP treated sorghum cells

### a. CV-anova results for the OPLS model for M2

$$[R^2X \text{ (cum)} = 0.514; R^2Y \text{ (cum)} = 0.998; Q^2 \text{ (cum)} = 0.985].$$

| M2(Con vs 6 h) | SS       | DF | MS        | F       | p            | SD       |
|----------------|----------|----|-----------|---------|--------------|----------|
| Total corr.    | 39       | 39 | 1         |         |              | 1        |
| Regression     | 38.4257  | 6  | 6.40428   | 367.982 | 9.34485e-029 | 2.53067  |
| Residual       | 0.574325 | 33 | 0.0174038 |         |              | 0.131923 |

### b. CV-anova results for the OPLS model for M3

$$[R^2X \text{ (cum)} = 0.498; R^2Y \text{ (cum)} = 0.996; Q^2 \text{ (cum)} = 0.992].$$

| M3(Con vs 12 h) | SS       | DF | MS         | F       | p            | SD       |
|-----------------|----------|----|------------|---------|--------------|----------|
| Total corr.     | 39       | 39 | 1          |         |              | 1        |
| Regression      | 38.6956  | 4  | 9.67389    | 1112.15 | 2.40803e-036 | 3.11029  |
| Residual        | 0.304442 | 35 | 0.00869835 |         |              | 0.093265 |

### c. CV-anova results for the OPLS model for M4

$$[R^2X \text{ (cum)} = 0.550; R^2Y \text{ (cum)} = 0.996; Q^2 \text{ (cum)} = 0.993].$$

| M4(Con vs 18 h) | SS       | DF | MS        | F       | p            | SD        |
|-----------------|----------|----|-----------|---------|--------------|-----------|
| Total corr.     | 39       | 39 | 1         |         |              | 1         |
| Regression      | 38.7321  | 4  | 9.68303   | 1265.14 | 2.56831e-037 | 3.11176   |
| Residual        | 0.267879 | 35 | 0.0076537 |         |              | 0.0874854 |

### d. CV-anova results for the OPLS model for M5

$$[R^2X \text{ (cum)} = 0.584; R^2Y \text{ (cum)} = 0.997; Q^2 \text{ (cum)} = 0.994].$$

| M5(Con vs 24 h) | SS       | DF | MS         | F       | p | SD        |
|-----------------|----------|----|------------|---------|---|-----------|
| Total corr.     | 39       | 39 | 1          |         |   | 1         |
| Regression      | 38.7779  | 4  | 9.69448    | 1527.85 | 0 | 3.1136    |
| Residual        | 0.222081 | 35 | 0.00634516 |         |   | 0.0796565 |

## Reference

L. Eriksson, J. Trygg, S. Wold, CV-ANOVA for significance testing of PLS and OPLS® models, J. Chemometr 22 (2008) 594-600.
